# Supplementary material for: Bonding-induced thermal transport enhancement across a hard/soft material interface using molecular monolayers
Source: Royal Society of Chemistry journal article supplement (doi:10.1039/c7cp00209b), 2017-01-01
Supplement: c7cp00209b1.pdf [file c7cp00209b1.pdf]

## Electronic Supporting Information

### **Bonding-induced thermal transport enhancement across hard/soft materials interface using molecular monolayers**

Chao Yuan, Mengyu Huang, Yanhua Cheng and Xiaobing Luo\*

State Key Laboratory of Coal Combustion, School of Energy and Power Engineering,

Huazhong University of Science and Technology, Wuhan 430074, China.

\*E-mail: [luoxb@hust.edu.cn](mailto:luoxb@hust.edu.cn)

## Supplementary Figures

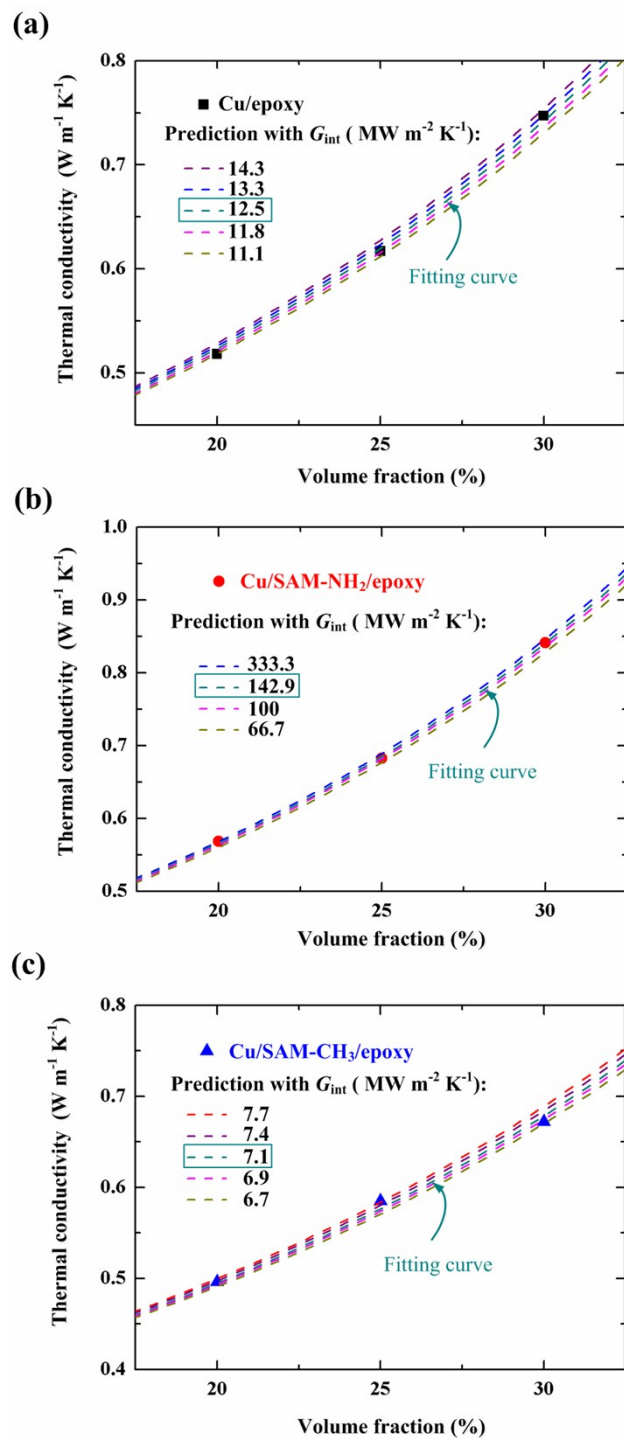

**Figure S1.** Data fitting to extract  $G_{\text{int}}$  of (a) Cu/epoxy, (b) Cu/SAM-NH<sub>2</sub>/epoxy and (c) Cu/SAM-CH<sub>3</sub>/epoxy interfaces. Dots: measured thermal conductivity of composites; Colored dash lines: predicted thermal conductivity from EMBM with different values of  $G_{\text{int}}$ .

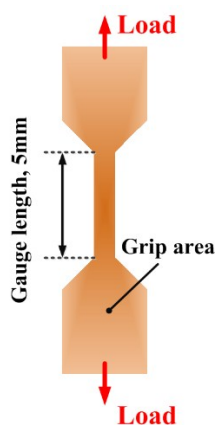

**Figure S2.** Schematic of the tensile test.

## Supplementary Tables

**Table S1.** Data of density, heat capacity, thermal diffusivity and thermal conductivity of copper and epoxy resin.

| Materials   | Density $\rho$ (g cm <sup>-3</sup> ) | Heat capacity $C_p$ (J g <sup>-1</sup> K <sup>-1</sup> ) | Thermal diffusivity $\alpha$ (mm <sup>2</sup> s <sup>-1</sup> ) | Thermal conductivity $k$ (W m <sup>-1</sup> K <sup>-1</sup> ) |
|-------------|--------------------------------------|----------------------------------------------------------|-----------------------------------------------------------------|---------------------------------------------------------------|
| Copper      | 8.9 <sup>1</sup>                     | 0.388 <sup>1</sup>                                       |                                                                 | 401 <sup>1</sup>                                              |
| Epoxy resin | 1.1 <sup>2</sup>                     | 1.669 <sup>a</sup>                                       | 0.159 <sup>b</sup>                                              | 0.292 <sup>c</sup>                                            |

<sup>a</sup> measured by a differential scanning calorimetry (Diamond DSC, PerkinElmer Instruments); <sup>b</sup> measured by LFA467; <sup>c</sup> calculated according to the formula:  $k = \alpha C_p \rho$ .

**Tables S2.** Data of effective density, heat capacity, thermal diffusivity and thermal conductivity for the composites at volume fraction of 20%, 25% and 30%.

| $f$ (%) | $\rho$ (g cm <sup>-3</sup> ) | $w$ (%) | $C_p$ (J g <sup>-1</sup> K <sup>-1</sup> ) | $\alpha$ (mm <sup>2</sup> s <sup>-1</sup> ) | $k$ (W m <sup>-1</sup> K <sup>-1</sup> ) |
|---------|------------------------------|---------|--------------------------------------------|---------------------------------------------|------------------------------------------|
|         |                              |         |                                            |                                             |                                          |

|    |      |       |       | Cu/epoxy | Cu/SAM-NH <sub>2</sub> /epoxy | Cu/SAM-CH <sub>3</sub> /epoxy | Cu/epoxy | Cu/SAM-NH <sub>2</sub> /epoxy | Cu/SAM-CH <sub>3</sub> /epoxy |
|----|------|-------|-------|----------|-------------------------------|-------------------------------|----------|-------------------------------|-------------------------------|
| 20 | 2.69 | 66.12 | 0.822 | 0.237    | 0.26                          | 0.227                         | 0.518    | 0.841                         | 0.672                         |
|    | 2    |       |       |          |                               |                               | 2        | 0                             |                               |
| 25 | 3.08 | 72.24 | 0.744 | 0.272    | 0.301                         | 0.258                         | 0.616    | 0.682                         | 0.585                         |
|    | 0    |       |       |          |                               |                               | 9        | 7                             | 1                             |
| 30 | 3.46 | 76.98 | 0.683 | 0.318    | 0.358                         | 0.284                         | 0.747    | 0.568                         | 0.496                         |
|    | 8    |       |       |          |                               |                               | 0        | 5                             | 3                             |

## Supplementary Notes

### 1. Cu modification with SAMs

Dodecanethiol (SAM-CH<sub>3</sub>):

1mM ethanolic solution was prepared by dissolving 0.0072 mL of dodecanethiol into 30 mL of ethanol. Subsequently, 5g of Cu powders were immersed into the solution and magnetically stirred for 24h at 25°C. The treated samples were then removed from the solution and rinsed thoroughly with ethanol before air drying.

11-Amino-1-undecanethiol hydrochloride (SAM-NH<sub>2</sub>):

1mM ethanolic solution was prepared by dissolving 0.0072g of 11-Amino-1-undecanethiol hydrochloride into 30 mL of ethanol. Subsequently, 5g of Cu powders were immersed into the solution and magnetically stirred for 24h at 25°C. The treated samples were then removed from the solution and rinsed thoroughly with ethanol before air drying.

## 2. Calculation of effective $C_p$ and $\rho$

$$C_p = wC_{\text{cop}} + (1-w)C_{\text{epoxy}} \quad (\text{S1})$$

where  $w$  is the weight percentage of copper powders in composites.  $C_{\text{cop}}$  and  $C_{\text{epoxy}}$  are the heat capacity of copper and epoxy, respectively, which are provided in Table S1.

$$\rho = f\rho_{\text{cop}} + (1-f)\rho_{\text{epoxy}} \quad (\text{S2})$$

where  $f$  is the volume fraction of copper powders in composites.  $\rho_{\text{cop}}$  and  $\rho_{\text{epoxy}}$  are the density of copper and epoxy, respectively, which are provided in Table S1. The calculated results are summarized in Table S2.

## 3. Extraction of $G_{\text{int}}$ for Cu/epoxy, Cu/SAM-NH<sub>2</sub>/epoxy and Cu/SAM-CH<sub>3</sub>/epoxy interface

Firstly, we used MBAM to predict  $k_{\text{eff}}$  under a variety of  $G_{\text{int}}$  values. A portion of the predicting results are provided in Fig. S1. Now,  $G_{\text{int}}$  can be extracted by fitting the measured thermal conductivity to one of the predicting curves. In order to obtain the precise fitting results, a variable,  $s$ , is introduced:

$$s = \sum_f (k_{p-f} - k_{m-f})^2 \quad f=20\%, 25\%, 30\% \quad (\text{S3})$$

where  $k_{p-f}$  and  $k_{m-f}$  are the predicted and measured thermal conductivity of composites at the volume fraction of  $f$ . The  $G_{\text{int}}$  under which  $k_{p-f}$  makes  $s$  minimal is the optimal fitting result. Figure S1 gives the fitting results for the Cu/epoxy, Cu/SAM-NH<sub>2</sub>/epoxy and Cu/SAM-CH<sub>3</sub>/epoxy systems, respectively.

## References

1. C. P. Dillon, *CRC Materials Science and Engineering Handbook*, Third edition, Access Intelligence, LLC, 2002.
2. Huntsman International LLC. Data sheet of epoxy resin. Available from: [http://www.huntsman.com/advanced\\_materials/a/Your%20Industry/Coatings?p\\_langswitch=1](http://www.huntsman.com/advanced_materials/a/Your%20Industry/Coatings?p_langswitch=1). Accessed: 2016-07-5.
